# Supplementary material for: Investigations of temporal and spatial distribution of precursors SO 2 and NO 2 vertical columns in the North China Plain using mobile DOAS
Source: Copernicus journal article supplement (doi:10.5194/acp-18-1535-2018), 2018-02-02
Supplement: Supplementary file 1 [file acp-18-1535-2018-supplement.pdf]

Supplement of Atmos. Chem. Phys., 18, 1535–1554, 2018  
<https://doi.org/10.5194/acp-18-1535-2018-supplement>  
© Author(s) 2018. This work is distributed under  
the Creative Commons Attribution 4.0 License.

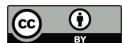

*Supplement of*

## **Investigations of temporal and spatial distribution of precursors SO<sub>2</sub> and NO<sub>2</sub> vertical columns in the North China Plain using mobile DOAS**

**Fengcheng Wu et al.**

*Correspondence to:* Pinhua Xie (phxie@aiofm.ac.cn)

The copyright of individual parts of the supplement might differ from the CC BY 4.0 License.

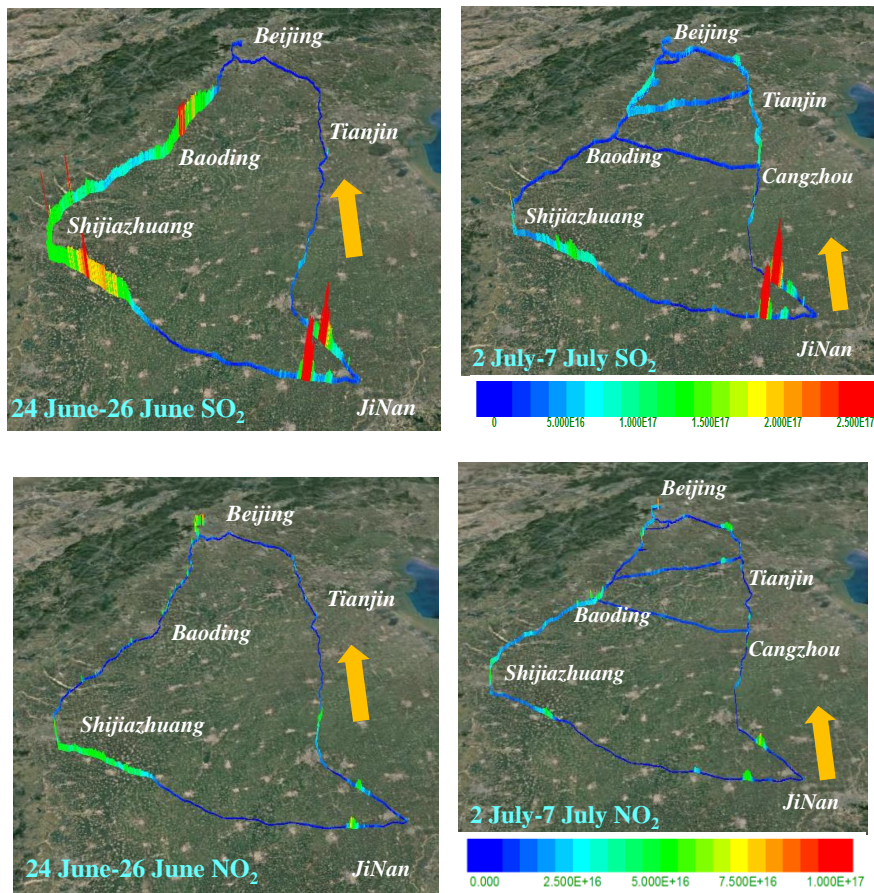

Fig. S1 Spatial distributions of SO<sub>2</sub> and NO<sub>2</sub>VCDs over the NCP area for Cycle 3 (24 June~26June) and Cycle 4 (2 July~7 July). The orange arrows show the dominant wind direction, but for Cycle 4 the measurement route of Beijing-Shijiazhuang and Cangzhou-Baoding-Cangzhou dominated by north wind.

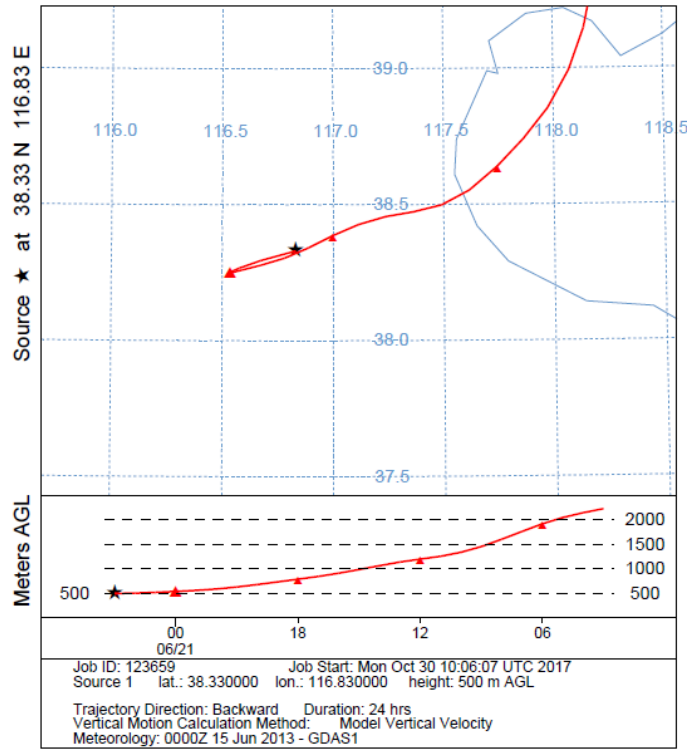

Fig. S2 The 24h air mass backward trajectories at 500 m height at Cangzhou city on 21 June
